# Supplementary material for: A global zircon U‒Th‒Pb geochronology database
Source: Copernicus journal article supplement (doi:10.5194/essd-2023-20), 2023-04-11
Supplement: Supplementary file 1 [file essd-2023-20-supplement.pdf]

Supplement of

## **A global zircon U–Th–Pb geochronology database**

Yujing Wu<sup>1</sup>, Xianjun Fang<sup>1</sup>, Jianqing Ji<sup>1,\*</sup>

<sup>1</sup>School of Earth and Space Sciences, Peking University, Beijing 100871, China

5 *Correspondence to:* Jianqing Ji (grsange@pku.edu.cn)

### **Outline**

**Figure S1. Spatial distribution of detrital zircons.**

10 **Figure S2. Spatial distribution of igneous zircons.**

**Figure S3. Spatial distribution of metamorphic zircons.**

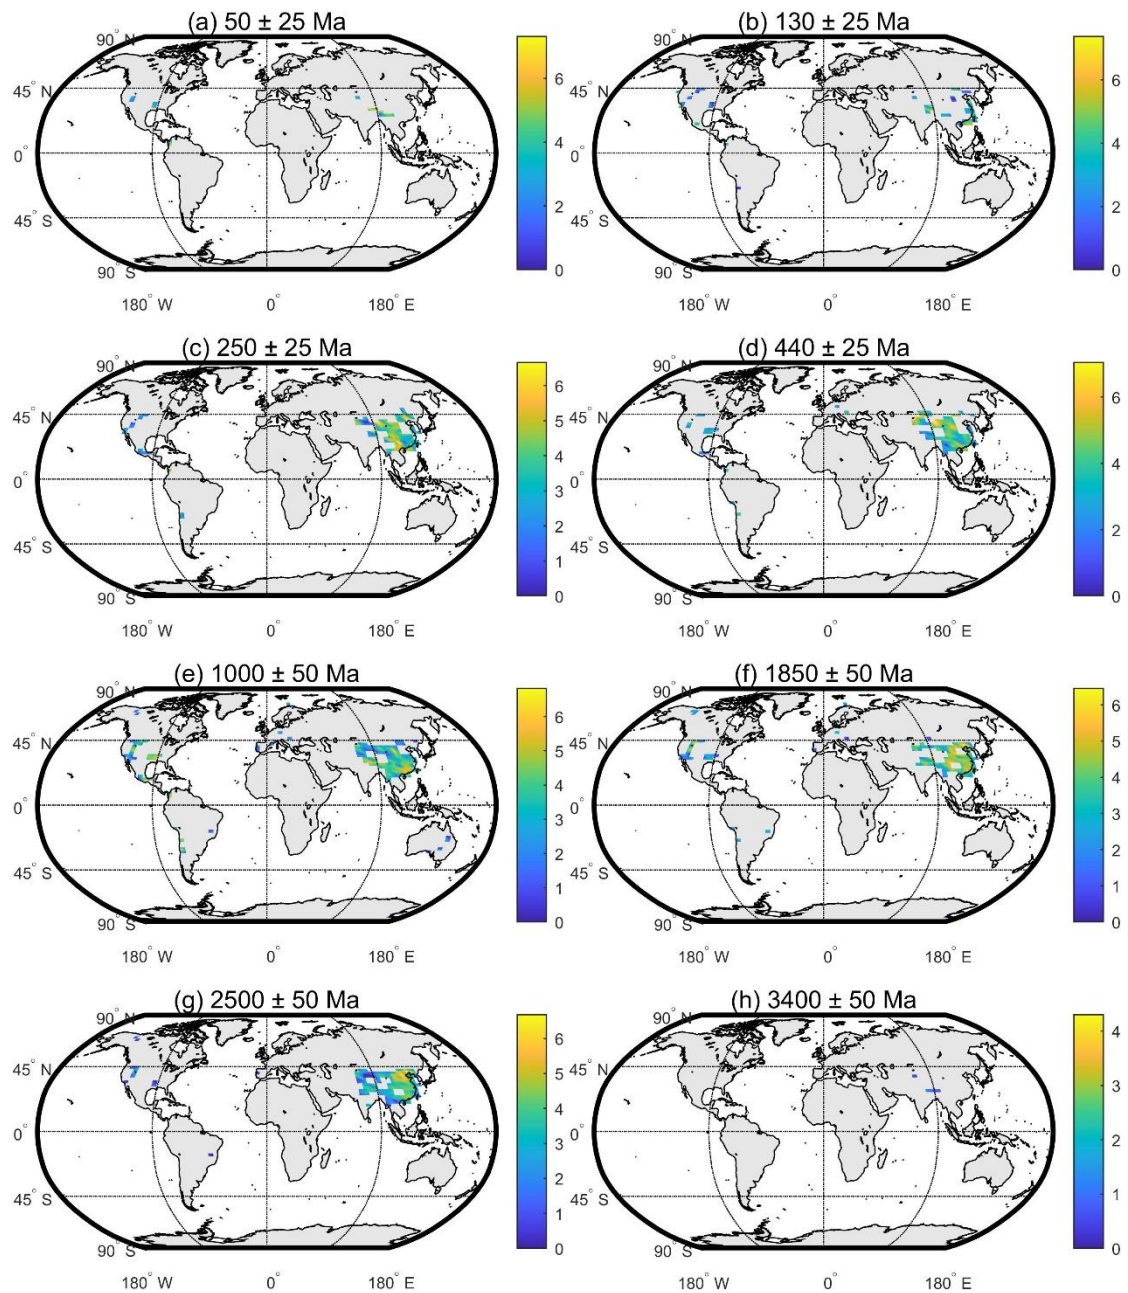

15 **Figure S1. Spatial distribution of detrital zircons. Since some areas were oversampled and old ages are sparse, we should pay more attention to relative rather than absolute zircon densities when comparing regions.**

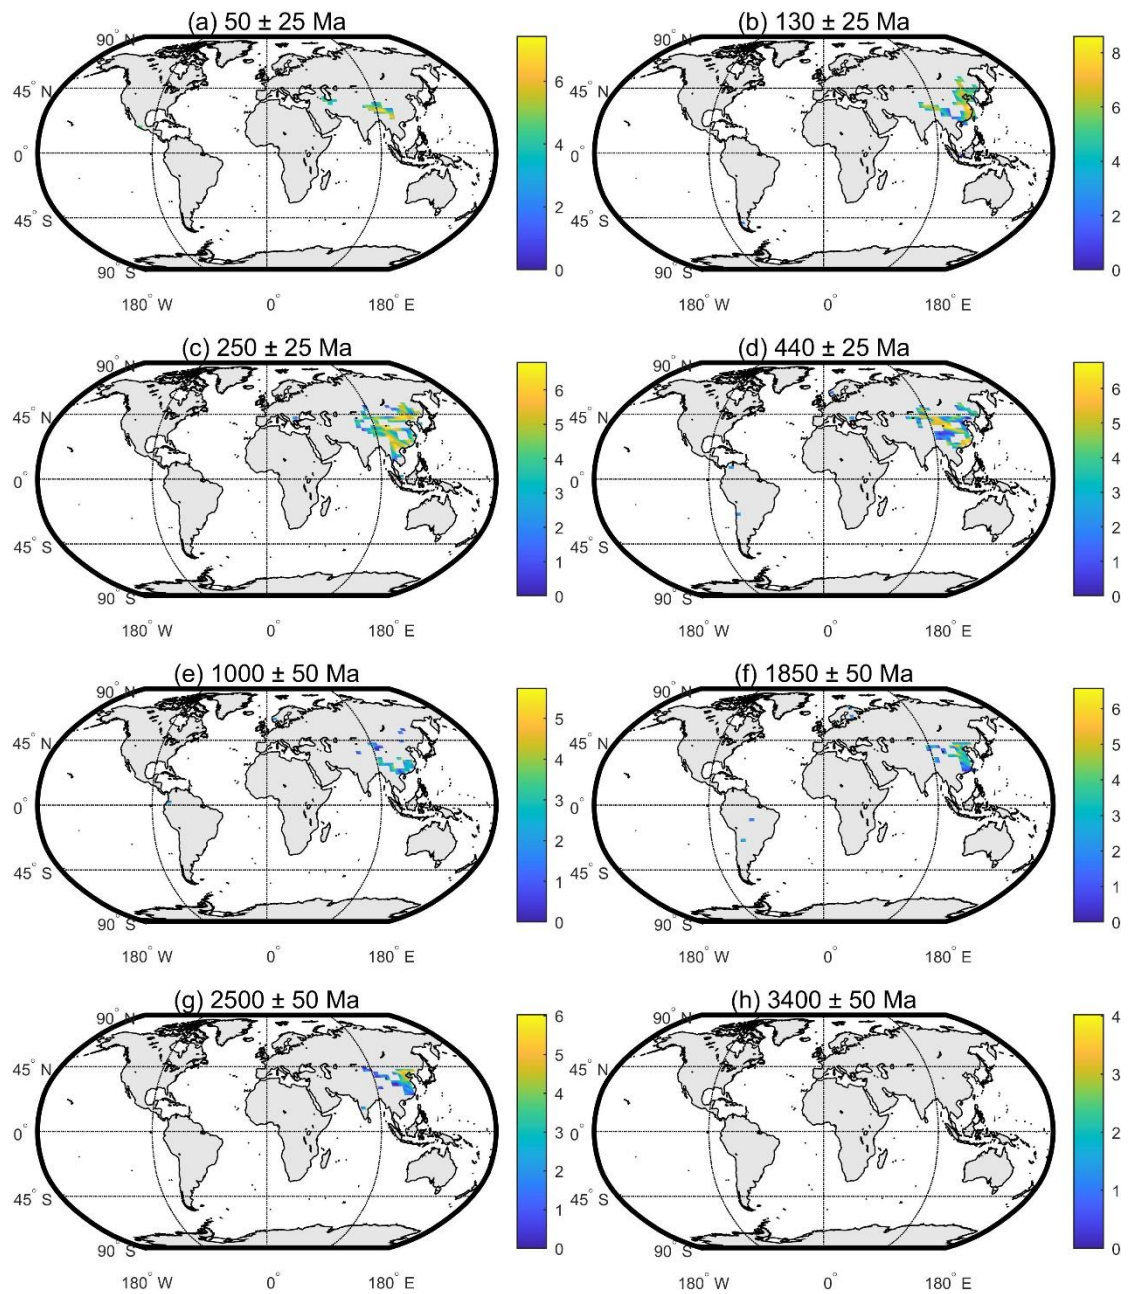

**Figure S2. Spatial distribution of igneous zircons. Since some areas were oversampled and old ages are sparse, we should pay more attention to relative rather than absolute zircon densities when comparing regions.**

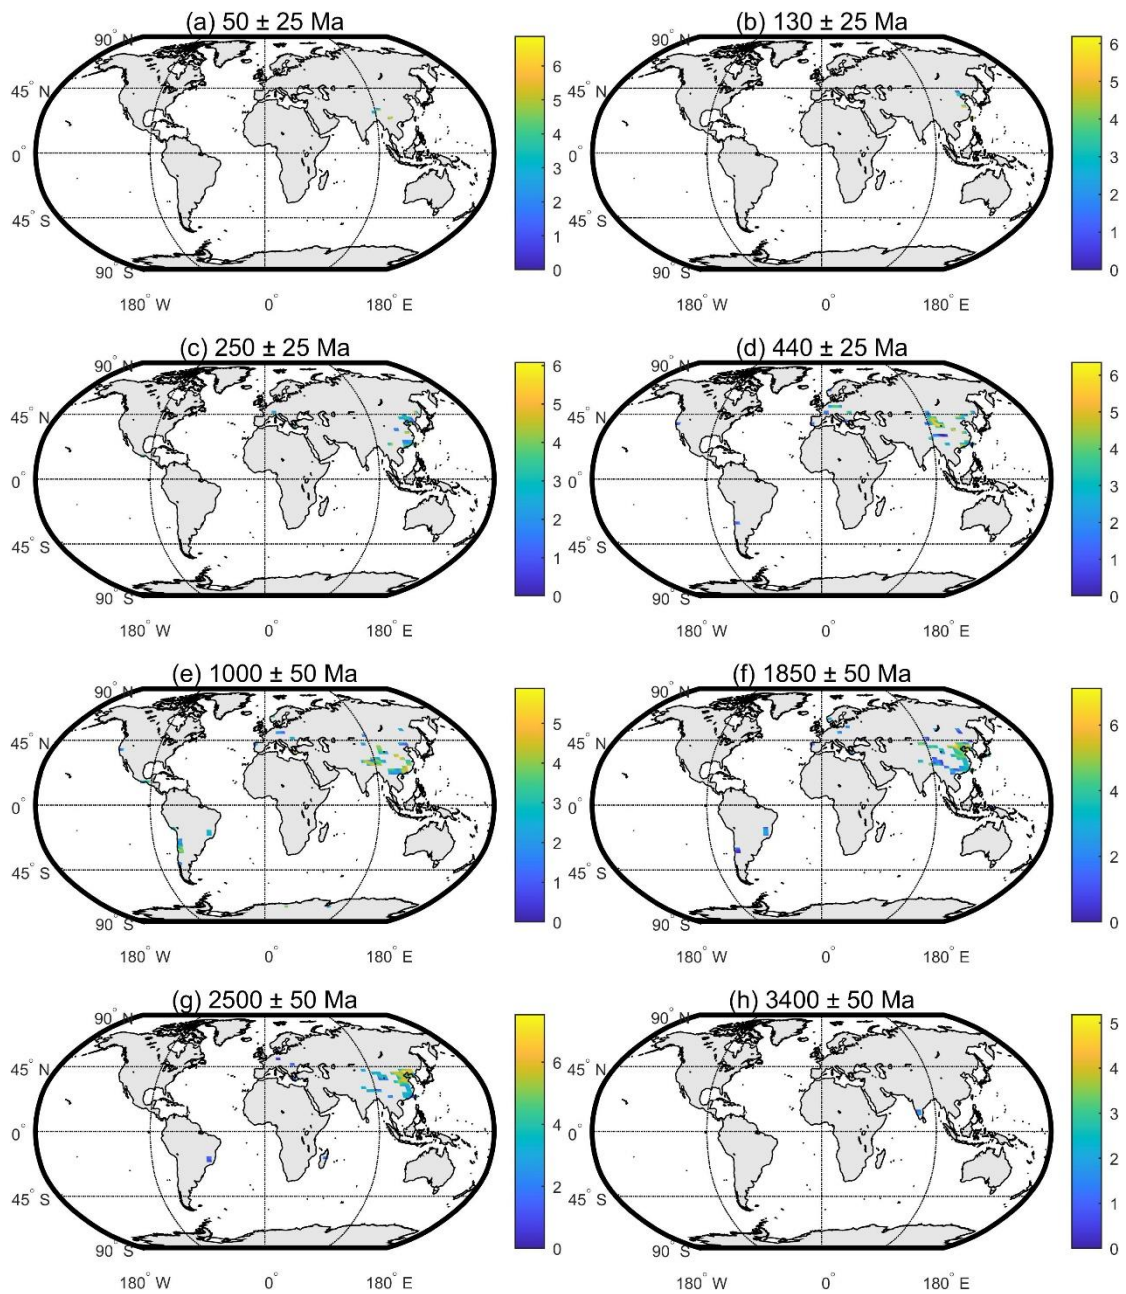

20

**Figure S3. Spatial distribution of metamorphic zircons. Since some areas were oversampled and old ages are sparse, we should pay more attention to relative rather than absolute zircon densities when comparing regions.**
